# Supplementary material for: On the correlation between dye coverage and photoelectrochemical performance in dye-sensitized solar cells
Source: Royal Society of Chemistry journal article supplement (doi:10.1039/c3cp52486h), 2013-10-21
Supplement: c3cp52486h.pdf [file c3cp52486h.pdf]

## Formation of N719 Dye Multilayers on Dye Sensitized Solar Cell Photoelectrode Surfaces Investigated by Direct Determination of Element Concentration Depth Profiles

Lilian Ellis-Gibbins<sup>a</sup>, Viktor Johansson<sup>b</sup>, Rick B Walsh<sup>c</sup>, Lars Kloo<sup>b</sup>, Jamie S Quinton,<sup>a</sup> and Gunther G Andersson<sup>a\*</sup>

<sup>a</sup> Flinders Centre for NanoScale Science and Technology, Flinders University, PO Box 2100, Adelaide SA 5001, Australia, E-mail: [gunther.andersson@flinders.edu.au](mailto:gunther.andersson@flinders.edu.au)

<sup>b</sup> Applied Physical Chemistry, KTH Royal Institute of Technology, S-10044 Stockholm, Sweden, E-mail: [larsa@kth.se](mailto:larsa@kth.se)

<sup>c</sup> Department of Applied Mathematics, Research School of Physics and Engineering, The Australian National University, Canberra ACT 0200 Australia, E-mail: [rbw110@physics.anu.edu.au](mailto:rbw110@physics.anu.edu.au)

### Electronic supplementary information (ESI)

#### I. Deconvolution of Concentration Depth Profiles and Correction for Spherical nature of the Titania Particles

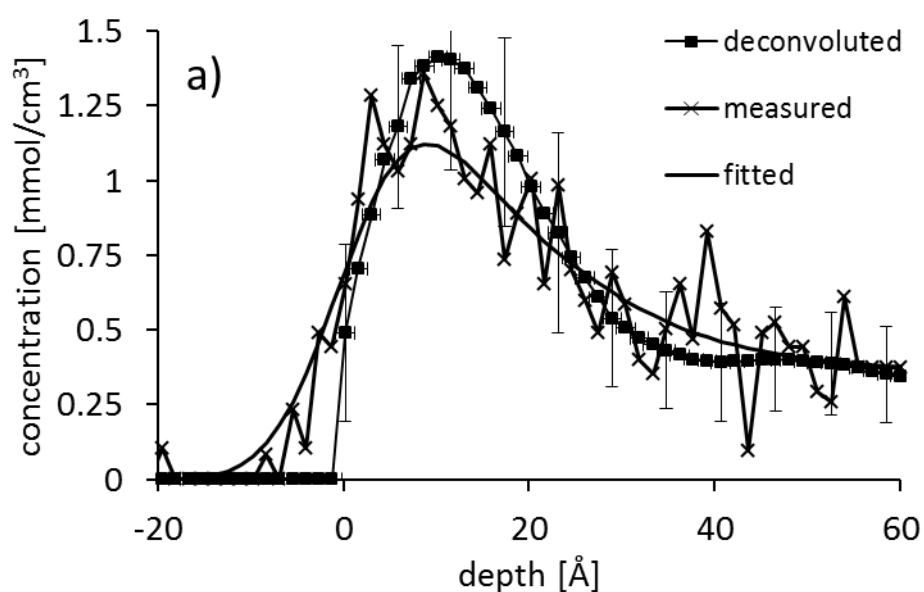

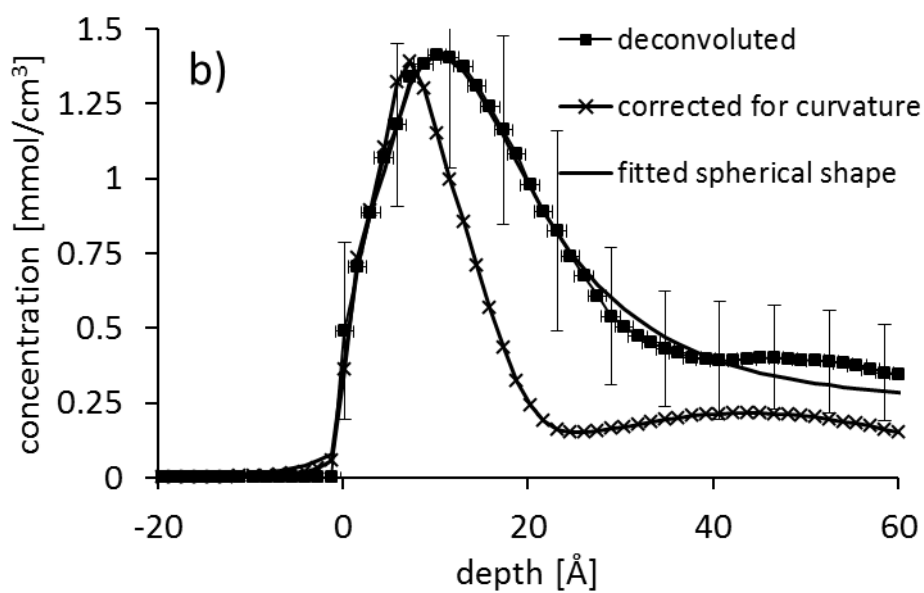

Figure S1: In a) the measured and deconvoluted concentration depth profile is shown of the 0.045 mM solution. The fitted graph is a convolution of the deconvoluted spectrum showing the quality of the deconvolution. In b) the concentration depth profile corrected for the curvature of the spherical titania particle is shown. The fitted curves shows the quality of the procedure correcting for the spherical nature of the titania particles.
